# Supplementary material for: A covalently cross-linked reduced functionalized graphene oxide/polyurethane composite based on Diels–Alder chemistry and its potential application in healable flexible electronics
Source: Royal Society of Chemistry journal article supplement (doi:10.1039/c6tc04715g), 2016-11-22
Supplement: c6tc04715g1.pdf [file c6tc04715g1.pdf]

Supporting Information

**Covalently cross-linked reduced functionalized graphene oxide/polyurethane composite based on Diels-Alder chemistry and the potential application in healable flexible electronics**

Jinhui Li<sup>a,b</sup>, Guoping Zhang<sup>a,c\*</sup>, Rong Sun<sup>a</sup>, and Ching-Ping Wong<sup>c,d</sup>

<sup>a</sup> Shenzhen Institutes of Advanced Technology, University of Chinese Academy of Sciences, Shenzhen 518055, China.

<sup>b</sup> Shenzhen College of Advanced Technology, University of Chinese Academy of Sciences, Shenzhen 518055, China

<sup>c</sup> Department of Electronic Engineering, Faculty of Engineering, The Chinese University of Hong Kong, Hong Kong, China

<sup>d</sup> School of Materials Science and Engineering, Georgia Institute of Technology, 771 Ferst Drive, Atlanta, GA 30332, USA

E-mail: gp.zhang@siat.ac.cn; Fax: +86-755-86392299; Tel: +86-755-86392104

1. AFM image of the GO sheets.

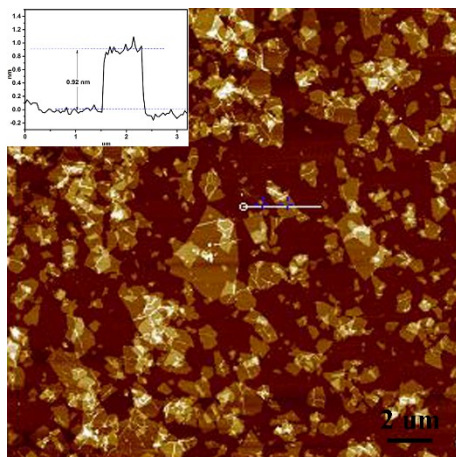

Fig. S1. AFM image of GO.

2. XRD patterns of GO and RFGO

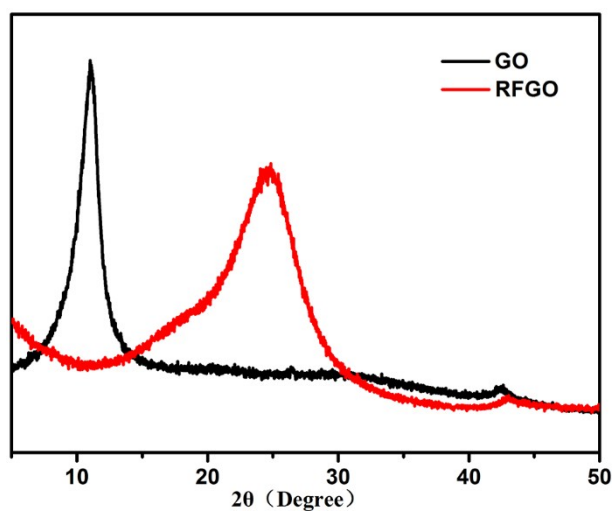

Fig. S2. XRD patterns of GO and RFGO.

### 3. TGA curves of GO and RFGO

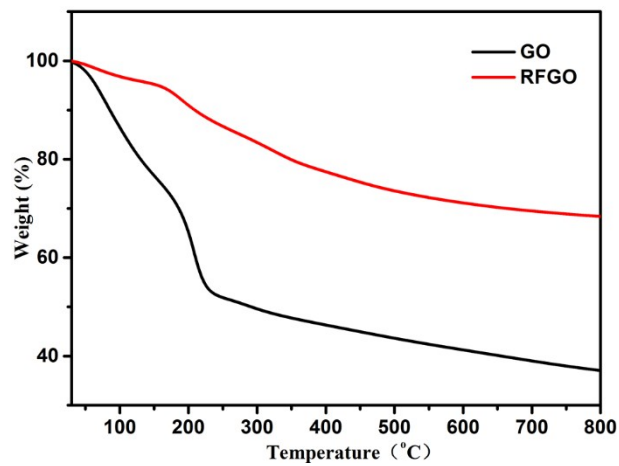

Fig. S3. TGA curves of GO and RFGO.

### 4. <sup>1</sup>H NMR of 2F2OH

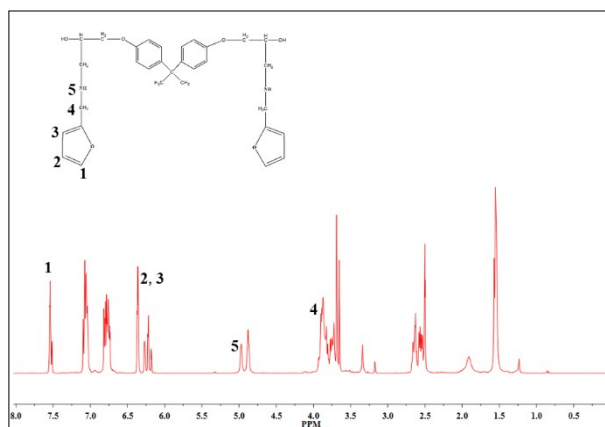

Fig. S4. <sup>1</sup>H NMR of 2F2OH.

5. The SEM images of FGF

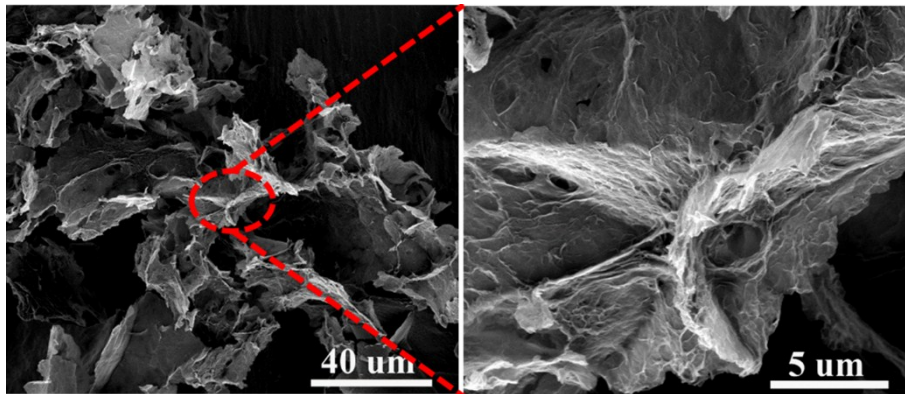

Fig. S5. SEM images of FGF at different magnifications.

6. The cross-section SEM image of FGF/RFGO-DAPU-3 composite

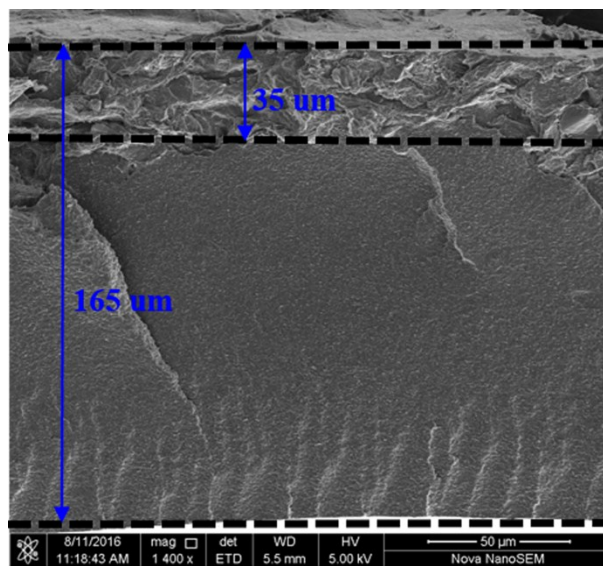

Fig. S6. The cross-section SEM image of FGF/RFGO-DAPU-3 composite

7. The flexibility of FGF/RFGO-DAPU-3 as conductor

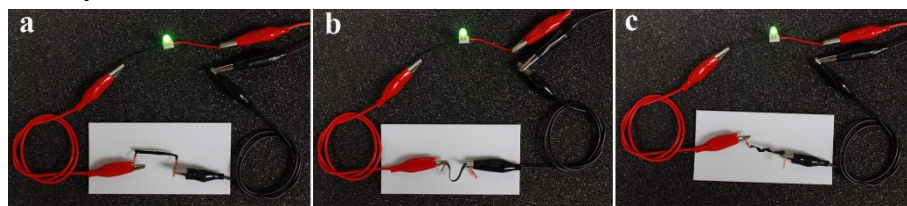

Fig. S7. The flexibility of FGF/RFGO-DAPU-3 as conductor
